# Supplementary material
Source: Springer Nature journal article supplement (https://www.springermedizin.de/resource/supplementary/12888_2013_1537_MOESM1_ESM.pdf/9481284)
Supplement: MOESM1 [file 9481284]

Start

✓ Aufgaben

📧 Nachrichten

👤 Kontaktpersonen

Programm

📅 GET.ON Stimmung

Tagebuch

📖 Depression

1

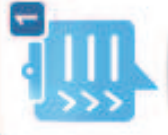

### AUFGABE

Aufgabe verfügbar  
Aufgabe "GET.ON Stimmung Lektion 1" verfügbar in  
"GET.ON Stimmung".

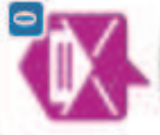

### NEUE MITTEILUNGEN

Sie haben keine neuen Mitteilungen.

[Alle Ihre Mitteilungen ansehen ▶](#)

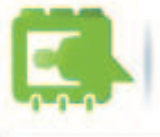

### KONTAKTPERSONEN

Claudia Buntrock

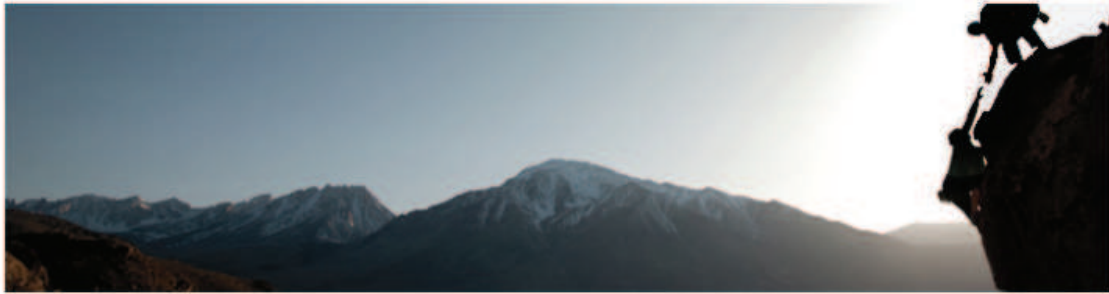

### 3. Der 6-Schritte-Plan

Der 6-Schritte-Plan aus dieser Lektion soll Sie dabei unterstützen, die Probleme zu bearbeiten, die Sie selbst beeinflussen können. Der Plan kann Sie motivieren und Ihnen Handlungsalternativen aufzeigen, wenn Sie nicht unmittelbar eine Lösung für ein Problem haben.

Wie sehen die 6 Schritte dieses Plans aus?

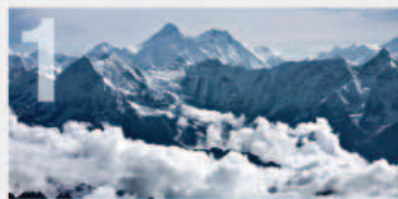

**SCHRITT 1:  
WAS IST MEIN PROBLEM?**

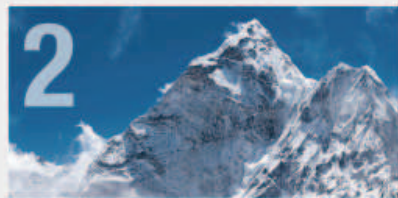

**SCHRITT 2:  
WAS IST MEIN ZIEL?**

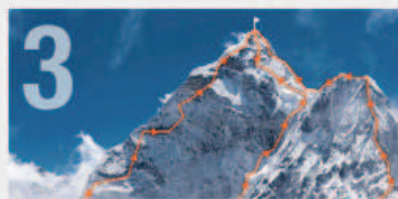

**SCHRITT 3:  
LÖSUNGSMÖGLICHKEITEN  
FINDEN**

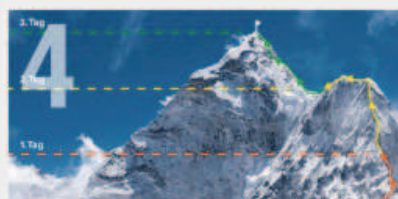

**SCHRITT 4:  
DIE (KLEINEN) SCHRITTE ZUR  
PROBLEM-LÖSUNG FESTLEGEN**

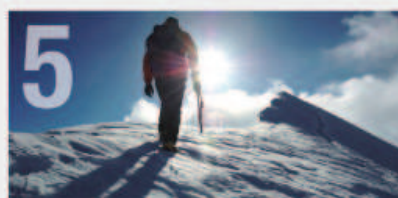

**SCHRITT 5:  
DIE LÖSUNGSMÖGLICHKEIT  
AUSPROBIEREN**

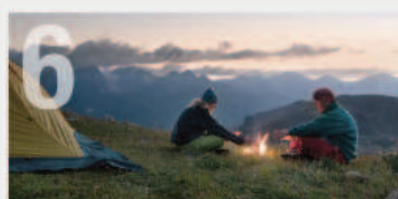

**SCHRITT 6:  
BILANZ ZIEHEN**

Im Folgenden haben Sie die Möglichkeit, Ihren ersten 6-Schritte-Plan zu bearbeiten.  
**Klicken Sie auf "Weiter", um fortzufahren.**

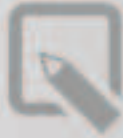

## Planen Sie Ihre Aktivitäten

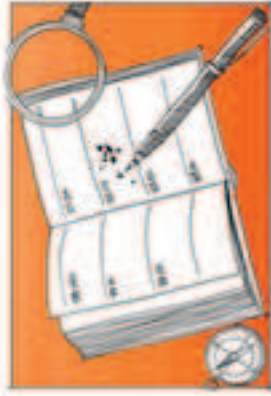

An dieser Stelle laden wir Sie wieder dazu ein, Aktivitäten zu planen, um die wichtigen Dinge in Ihrem Leben weiter zu stärken und Ihre Stimmung weiter zu verbessern. Schauen Sie sich für Ihre Aktivitätenplanung ruhig noch einmal Ihre persönliche Sammlung von Aktivitäten an.

 ▶ Meine wichtigen Dinge und wie ich diese stärken möchte

 ▶ Meine positiven Aktivitäten

| Wochentag | Aktivität            | Mögliches Hindernis  | Wie ich das überwinde |
|-----------|----------------------|----------------------|-----------------------|
| -         | <input type="text"/> | <input type="text"/> | <input type="text"/>  |

 Hinzufügen 

Nicole  Jürgen

Nachdem Sie nun Ihre Aktivitäten geplant haben, haben Sie nun die Möglichkeit, noch einmal über Ihre Lernerfahrungen nachzudenken und im Überblick zu sehen, was Sie in der nächsten Lektion erwarten wird.

**Klicken Sie auf "Weiter", um diese Lektion zu beenden.**
